# Supplementary material for: Genome-Wide Pharmacogenetics of Antidepressant Response in the GENDEP Project
Source: Atypon-hosted journal article supplement (doi:10.1176/appi.ajp.2009.09070932), 2010-04-02
Supplement: ajp_167_05_555_01.pdf [file ajp_167_05_555_01.pdf]

**Supplementary material: Pharmacogenetic analyses of imputed non-genotyped markers in genomic regions identified in the genome-wide analyses**

To explore the extent of the associated genomic regions, all HapMap phase II SNPs within 100kb upstream and downstream of markers identified at genome-wide or suggestive significance levels of significance were imputed and tested for association using Markov Chains algorithm (with 50 iterations) implemented in the MACH software (1,2). A broader region (200kb each side) was imputed for the Chromosome 1 associated locus, as a 100kb window was not sufficient to capture the full extent of the associated region.

**Figure S3: Chromosome 1 associated region and response to antidepressants in the whole sample.** Negative decadic logarithm of the uncorrected probability of false positive (p values) is plotted against chromosomal location of genotyped (full circles) and imputed (empty circles) SNP markers. P-values smaller than  $5 \times 10^{-6}$  (suggestive significant) are in blue. The graph covers 100kbp upstream and downstream from the strongest associated genotyped marker (rs2136093).

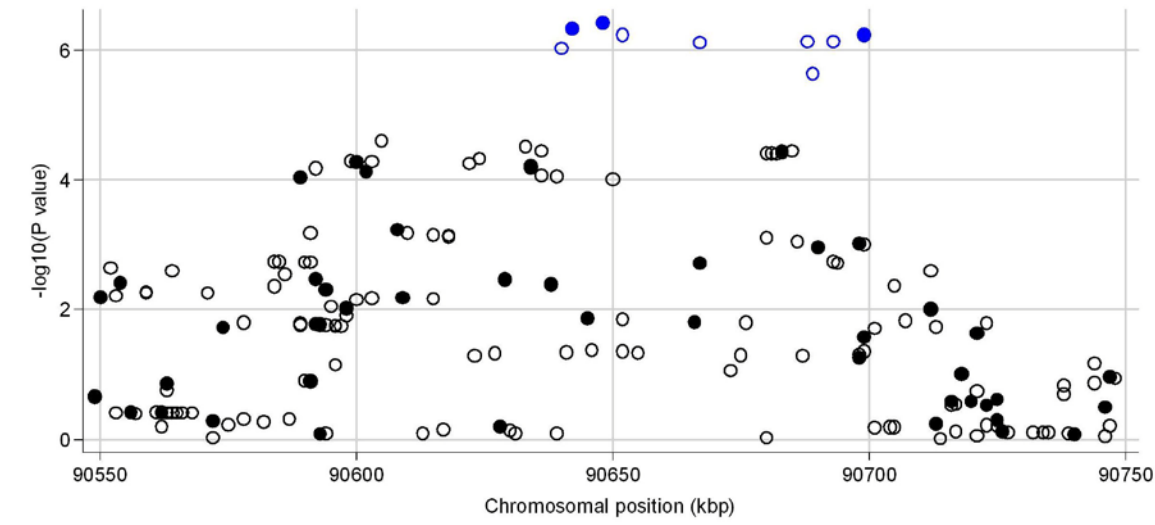

**Table S5: Genotyped and imputed SNPs within the associated region on chromosome 1 showing suggestive associations with response to antidepressants ( $p < 5 \times 10^{-6}$ ).**

The table includes the marker name (SNP), chromosomal location (Position), and minor allele frequency (MAF). Accuracy is an estimate of the r-squared correlation between estimated and true genotypes. Regression coefficients  $b$  indicate extra percentage improvement for each minor allele, a negative  $b$  means that carriers of minor alleles had worse outcome.

| SNP        | Position | MAF  | Accuracy | $b$   | p        | Imputed |
|------------|----------|------|----------|-------|----------|---------|
| rs10218464 | 90639568 | 0.33 | 0.98     | -8.00 | 9.47E-07 | Yes     |
| rs6701608  | 90641816 | 0.31 | 1.00     | -8.24 | 4.66E-07 | No      |
| rs2136093  | 90648480 | 0.31 | 1.00     | -8.29 | 3.82E-07 | No      |
| rs1472887  | 90652192 | 0.31 | 1.00     | -8.17 | 5.85E-07 | Yes     |
| rs7522605  | 90667128 | 0.31 | 1.00     | -8.10 | 7.72E-07 | Yes     |
| rs1027854  | 90688216 | 0.31 | 1.00     | -8.12 | 7.55E-07 | Yes     |
| rs1337576  | 90688656 | 0.29 | 1.00     | -7.95 | 2.35E-06 | Yes     |
| rs506368   | 90692608 | 0.31 | 1.00     | -8.13 | 7.49E-07 | Yes     |
| rs2136094  | 90698568 | 0.26 | 1.00     | -8.83 | 5.86E-07 | No      |

**Figure S6: Chromosome 10 associated region and response to antidepressants in the whole sample.** Negative decadic logarithm of the uncorrected probability of false positive ( $p$  values) is plotted against chromosomal location of genotyped (full circles) and imputed (empty circles) SNP markers. P-values smaller than  $5 \times 10^{-6}$  (suggestive significant) are in blue. The graph covers 200kbp upstream and downstream from the three associated genotyped markers.

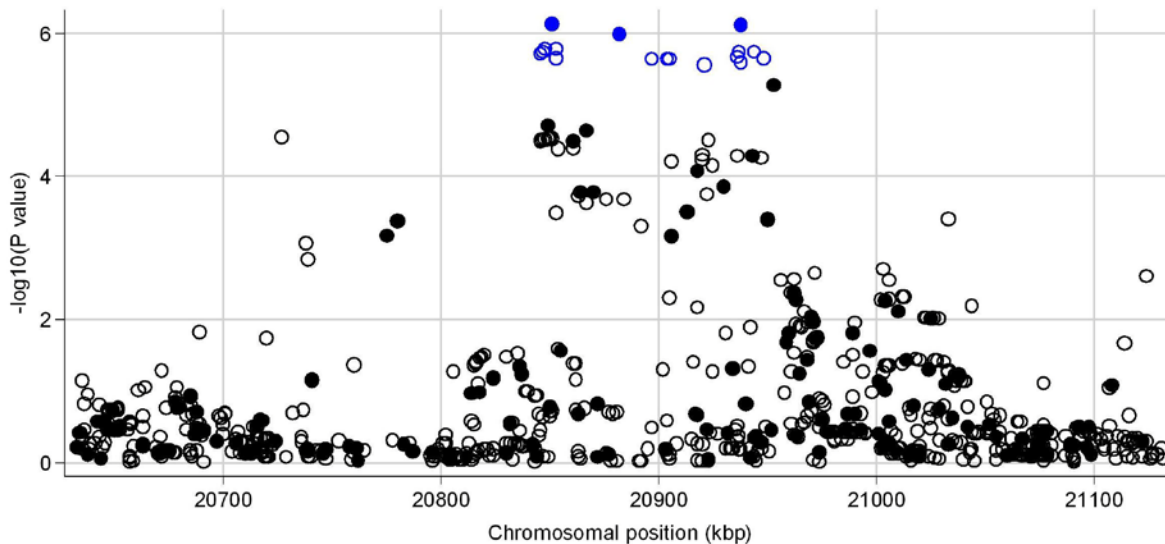

**Table S4: Genotyped and imputed SNPs within the associated region on chromosome 10 showing suggestive associations with response to antidepressants ( $p < 5 \times 10^{-6}$ ).** The table includes the marker name (SNP), chromosomal location (Position), and minor allele frequency (MAF). Accuracy is an estimate of the  $r$ -squared correlation between estimated and true genotypes. Regression coefficients  $b$  indicate extra percentage improvement for each minor allele, a negative  $b$  means that carriers of minor alleles had worse outcome.

| SNP        | Position | MAF  | Accuracy | $b$    | $p$      | Imputed |
|------------|----------|------|----------|--------|----------|---------|
| rs16920587 | 20846406 | 0.06 | 0.97     | -15.48 | 1.98E-06 | Yes     |
| rs16920589 | 20846536 | 0.06 | 0.98     | -15.46 | 1.85E-06 | Yes     |
| rs7910350  | 20848396 | 0.06 | 0.99     | -15.42 | 1.68E-06 | Yes     |
| rs16920624 | 20850532 | 0.07 | 1.00     | -16.04 | 7.37E-07 | No      |
| rs1339653  | 20853068 | 0.06 | 0.99     | -15.46 | 1.65E-06 | Yes     |
| rs1339654  | 20853462 | 0.06 | 1.00     | -15.25 | 2.26E-06 | Yes     |
| rs7081156  | 20882036 | 0.06 | 1.00     | -15.90 | 1.01E-06 | No      |
| rs11595329 | 20897224 | 0.06 | 1.00     | -15.22 | 2.33E-06 | Yes     |
| rs12247444 | 20904498 | 0.06 | 1.00     | -15.22 | 2.33E-06 | Yes     |
| rs11819199 | 20905164 | 0.06 | 1.00     | -15.22 | 2.33E-06 | Yes     |
| rs11594336 | 20920502 | 0.07 | 0.99     | -15.04 | 2.76E-06 | Yes     |
| rs16920700 | 20935812 | 0.07 | 1.00     | -15.06 | 2.14E-06 | Yes     |
| rs11598280 | 20937260 | 0.07 | 1.00     | -15.11 | 1.85E-06 | Yes     |
| rs11598341 | 20937548 | 0.07 | 0.99     | -14.87 | 2.51E-06 | Yes     |
| rs11598854 | 20937908 | 0.07 | 1.00     | -15.84 | 7.67E-07 | No      |
| rs11593835 | 20944160 | 0.07 | 1.00     | -15.11 | 1.85E-06 | Yes     |
| rs2359537  | 20947672 | 0.07 | 1.00     | -15.03 | 2.27E-06 | Yes     |

**Figure S7: Interleukin 11 gene and the adjacent chromosome 19 region and response to escitalopram.** Negative decadic logarithm of the uncorrected probability of false positive (p values) is plotted against chromosomal location of genotyped (full circles) and imputed (empty circles) SNP markers. P-values smaller than  $5 \times 10^{-6}$  (suggestive significant) are in blue. The graph covers 100kbp upstream and downstream from the strongest associated genotyped marker (rs1126757).

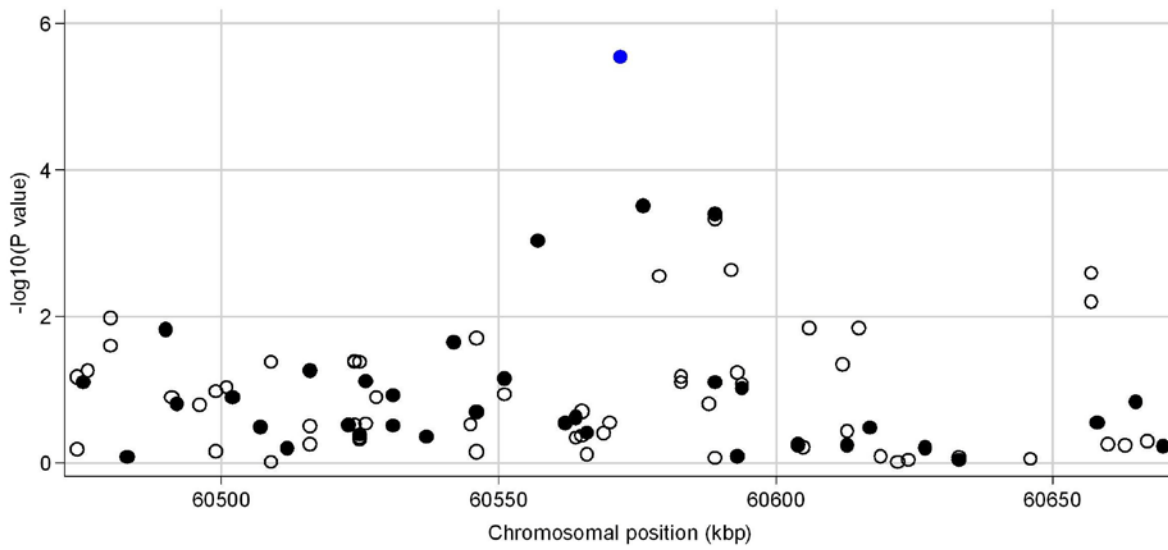

**Table S5: Genotyped and imputed SNPs within the IL11 gene region on chromosome 19 showing suggestive associations with response to antidepressants ( $p < 5 \times 10^{-6}$ ).** The table includes the marker name (SNP), chromosomal location (Position), and minor allele frequency (MAF). Accuracy is an estimate of the r-squared correlation between estimated and true genotypes. Regression coefficients  $b$  indicate extra percentage improvement for each minor allele, a negative  $b$  means that carriers of minor alleles had worse outcome.

| Snp       | position | maf  | rsqr1 | $b$   | p        | imputed |
|-----------|----------|------|-------|-------|----------|---------|
| rs1126757 | 60571684 | 0.48 | 1.00  | 10.39 | 2.83E-06 | No      |

**No imputed SNP reached  $p < 5 \times 10^{-6}$**

**Figure S9: Uronyl sulfotransferase (*UST*) gene and the adjacent chromosome 6 region and response to nortriptyline.** Negative decadic logarithm of the uncorrected probability of false positive (p values) is plotted against chromosomal location of genotyped (full circles) and imputed (empty circles) SNP markers. P-values smaller than  $5 \times 10^{-6}$  (suggestive significant) are in blue. P-values smaller than  $5 \times 10^{-8}$  (genome-wide significant) are in red. The graph covers 100kbp upstream and downstream from the strongest associated genotyped marker (rs2500535).

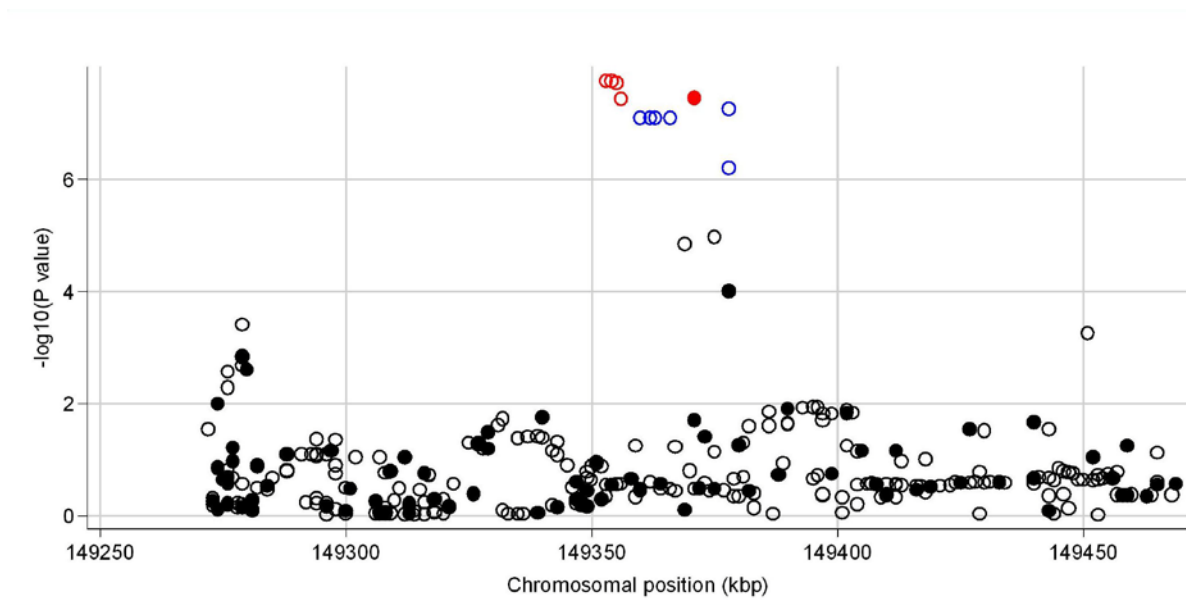

**Table S6: Genotyped and imputed SNPs within the *UST* gene region on chromosome 6 showing suggestive or genome-wide significant associations with response to nortriptyline ( $p < 5 \times 10^{-6}$ ).** The table includes the marker name (SNP), chromosomal location (Position), and minor allele frequency (MAF). Accuracy is an estimate of the r-squared correlation between estimated and true genotypes. Regression coefficients  $b$  indicate extra percentage improvement for each minor allele, a negative  $b$  means that carriers of minor alleles had worse outcome.

| SNP       | Position  | MAF  | Accuracy | $b$    | $p$      | Imputed |
|-----------|-----------|------|----------|--------|----------|---------|
| rs2486404 | 149353296 | 0.05 | 0.90     | -30.68 | 1.73E-08 | Yes     |
| rs2500525 | 149354032 | 0.05 | 0.90     | -30.65 | 1.74E-08 | Yes     |
| rs2486403 | 149354848 | 0.05 | 0.90     | -30.37 | 1.88E-08 | Yes     |
| rs2486402 | 149355984 | 0.05 | 0.93     | -28.48 | 3.70E-08 | Yes     |
| rs2486398 | 149360496 | 0.06 | 1.00     | -26.63 | 7.91E-08 | Yes     |
| rs2500530 | 149361984 | 0.06 | 1.00     | -26.62 | 7.95E-08 | Yes     |
| rs2486397 | 149362368 | 0.06 | 1.00     | -26.62 | 7.97E-08 | Yes     |
| rs2486396 | 149363440 | 0.06 | 1.00     | -26.61 | 7.99E-08 | Yes     |
| rs2486390 | 149365888 | 0.06 | 1.00     | -26.60 | 8.05E-08 | Yes     |
| rs2500535 | 149370960 | 0.06 | 1.00     | -27.04 | 3.56E-08 | No      |
| rs2486416 | 149377696 | 0.06 | 0.99     | -26.83 | 5.59E-08 | Yes     |
| rs2486415 | 149377872 | 0.04 | 1.00     | -26.66 | 6.25E-07 | Yes     |

**Figure S10: Genotyped and imputed SNPs within the RGL gene and adjacent region on chromosome 1 and response to nortriptyline.** Negative decadic logarithm of the uncorrected probability of false positive ( $p$  values) is plotted against chromosomal location of genotyped (full circles) and imputed (empty circles) SNP markers.  $P$ -values smaller than  $5 \times 10^{-6}$  (suggestive significant) are in blue. The graph covers 100kbp upstream and downstream from the strongest associated genotyped marker (rs4651156).

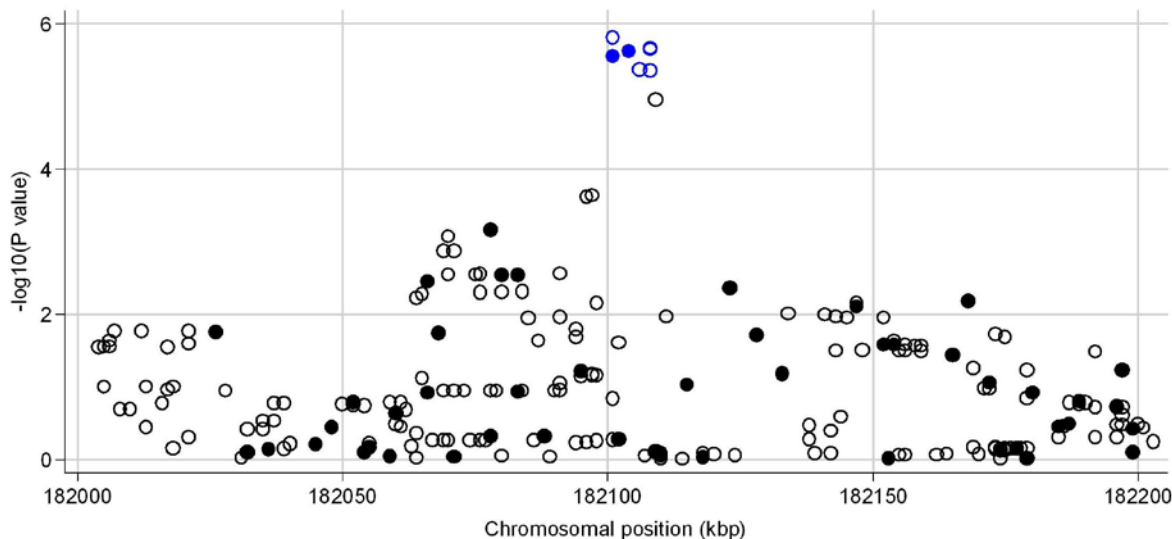

**Table S7: Genotyped and imputed SNPs within the RGL gene and adjacent region on chromosome 1 showing suggestive associations with response to nortriptyline ( $p < 5 \times 10^{-6}$ ).** The table includes the marker name (SNP), chromosomal location (Position), and minor allele frequency (MAF). Accuracy is an estimate of the r-squared correlation between estimated and true genotypes. Regression coefficients  $b$  indicate extra percentage improvement for each minor allele, a negative  $b$  means that carriers of minor alleles had worse outcome.

| SNP        | Position  | MAF  | Accuracy | $b$    | $p$      | Imputed |
|------------|-----------|------|----------|--------|----------|---------|
| rs9425322  | 182100688 | 0.17 | 1.00     | -14.97 | 2.76E-06 | No      |
| rs9425323  | 182100896 | 0.18 | 0.99     | -15.23 | 1.53E-06 | Yes     |
| rs4651156  | 182103648 | 0.29 | 1.00     | -12.63 | 2.39E-06 | No      |
| rs9425326  | 182105632 | 0.29 | 0.96     | -12.54 | 4.22E-06 | Yes     |
| rs9425616  | 182107728 | 0.17 | 0.92     | -15.52 | 2.21E-06 | Yes     |
| rs9425617  | 182108400 | 0.17 | 0.86     | -16.24 | 2.14E-06 | Yes     |
| rs10797917 | 182108416 | 0.28 | 0.85     | -13.31 | 4.34E-06 | Yes     |

**Figure S11: Genotyped and imputed SNPs within the *SLC27A1* gene and adjacent region on chromosome 19: genotype-drug interaction.** Negative decadic logarithm of the uncorrected probability of false positive (p values) is plotted against chromosomal location of genotyped (full circles) and imputed (empty circles) SNP markers. P-values smaller than  $5 \times 10^{-6}$  (suggestive significant) are in blue. The graph covers 100kbp upstream and downstream from the strongest associated genotyped marker (rs11666579).

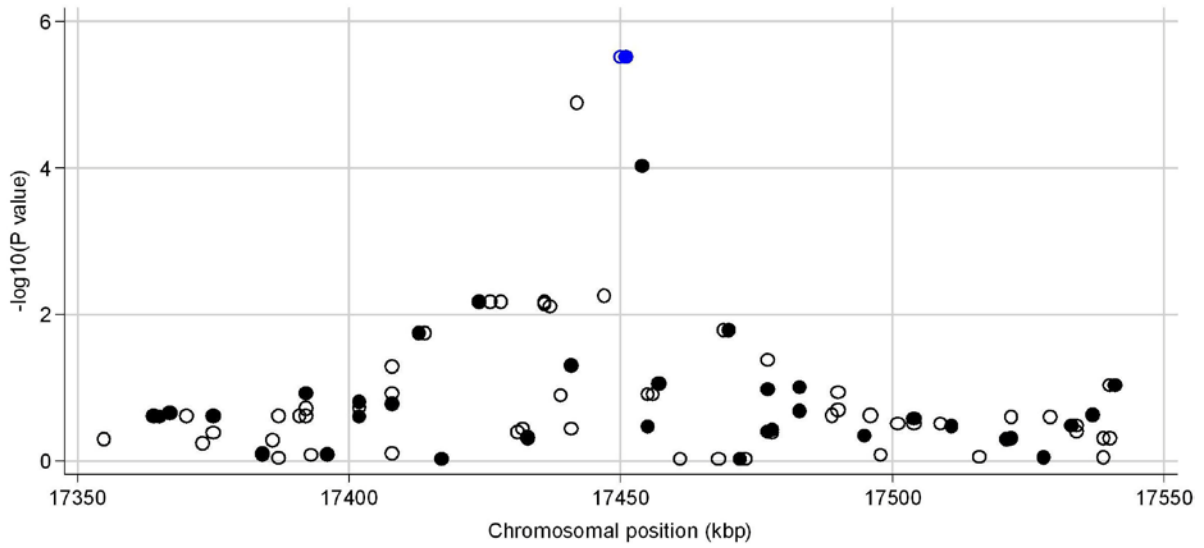

**Table S8: Genotyped and imputed SNPs within the *SLC27A1* gene and adjacent region on chromosome 19 showing suggestive genotype-drug interactions ( $p < 5 \times 10^{-6}$ ).** The table includes the marker name (SNP), chromosomal location (Position), and minor allele frequency (MAF). Accuracy is an estimate of the r-squared correlation between estimated and true genotypes. Regression coefficients  $b$  indicate extra percentage improvement for each minor allele with nortriptyline as opposed to escitalopram.

| SNP        | Position | MAF  | Accuracy | $b$   | $p$      | Imputed |
|------------|----------|------|----------|-------|----------|---------|
| rs8109783  | 17449762 | 0.48 | 0.99     | 14.38 | 3.06E-06 | Yes     |
| rs11666579 | 17451280 | 0.48 | 1.00     | 14.38 | 3.05E-06 | No      |

**Figure S12: Genotyped and imputed SNPs within the identified region on chromosome 18: genotype-drug interaction.** Negative decadic logarithm of the uncorrected probability of false positive (p values) is plotted against chromosomal location of genotyped (full circles) and imputed (empty circles) SNP markers. P-values smaller than  $5 \times 10^{-6}$  (suggestive significant) are in blue. The graph covers 100kbp upstream and downstream from the strongest associated genotyped marker (rs1013696).

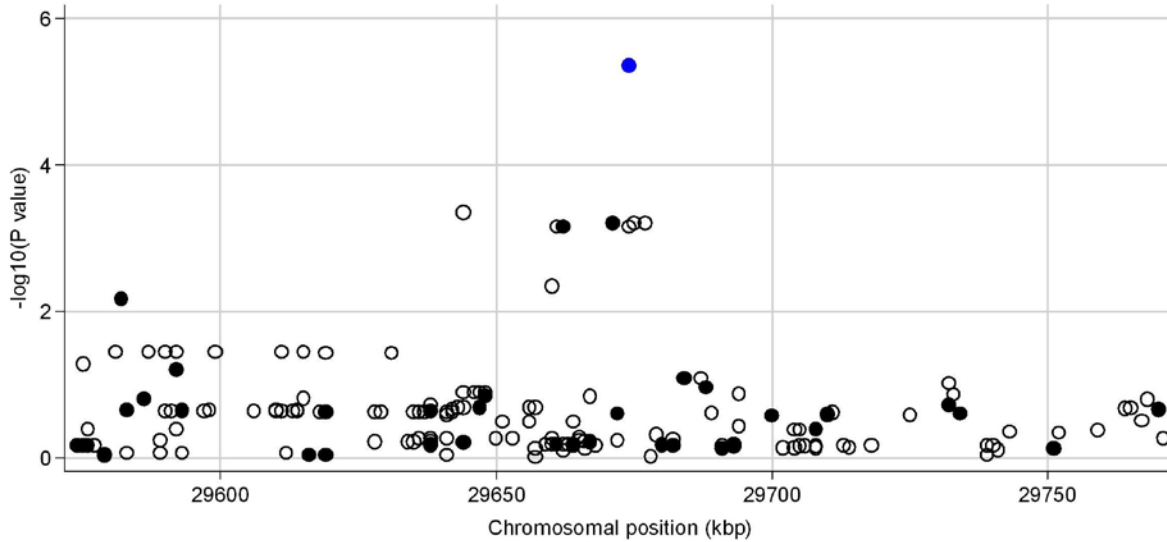

**Table S9: Genotyped and imputed SNPs within the identified region on chromosome 18 showing suggestive genotype-drug interactions ( $p < 5 \times 10^{-6}$ ).** The table includes the marker name (SNP), chromosomal location (Position), and minor allele frequency (MAF). Accuracy is an estimate of the r-squared correlation between estimated and true genotypes. Regression coefficients  $b$  indicate extra percentage improvement for each minor allele with nortriptyline as opposed to escitalopram.

| SNP       | Position | MAF  | Accuracy | $b$    | $p$      | Imputed |
|-----------|----------|------|----------|--------|----------|---------|
| rs1013696 | 29674008 | 0.22 | 1.00     | -17.84 | 4.33E-06 | No      |

**No imputed SNP reached  $p < 5 \times 10^{-6}$**



## References

1. Li Y, GR A: Rapid Haplotype Reconstruction and Missing Genotype Inference. Am J Hum Genet 2006; S792290
2. Li Y, Willer CJ, Cristen J, Ding J, Scheet P, Abecasis GR: Markov Model for Rapid Haplotyping and Genotype Imputation in Genome Wide Studies. (unpublished manuscript) 2006;
