# Supplementary material for: Genome-Wide Pharmacogenetics of Antidepressant Response in the GENDEP Project
Source: Atypon-hosted journal article supplement (doi:10.1176/appi.ajp.2009.09070932), 2010-04-02
Supplement: ajp_167_05_555_02.pdf [file ajp_167_05_555_02.pdf]

**Supplementary Table S1: List of candidate genes, their chromosomal location and rationale for their inclusion.**

| Gene symbol | Description                                    | Location     | Rationale                                            |
|-------------|------------------------------------------------|--------------|------------------------------------------------------|
| BDNF        | brain-derived neurotrophic factor              | 11p13        | Reported pharmacogenetic associations <sup>1,2</sup> |
| NTRK2       | neurotrophic tyrosine kinase, receptor, type 2 | 9q22.1       | BDNF receptor                                        |
| GSK3A       | glycogen synthase kinase 3 alpha               | 19q13.2      | Related to GSK3B                                     |
| GSK3B       | glycogen synthase kinase 3 beta                | 3q13.3       | Reported pharmacogenetic associations <sup>3,4</sup> |
| AKT1        | serine-threonine protein kinase 1              | 14q32.32     | Involved in BDNF signaling                           |
| NR3C1       | glucocorticoid receptor                        | 5q31.3       | Reported pharmacogenetic association <sup>5</sup>    |
| CRHR1       | Corticotropin-releasing factor receptor 1      | 17q12-q22    | Involved in depression pathogenesis <sup>6</sup>     |
| CREB1       | Cyclic AMP response element binding protein    | 2q34         | Reported pharmacogenetic association <sup>7</sup>    |
| SLC6A4      | serotonin transporter                          | 17q11.1      | Reported pharmacogenetic associations <sup>8</sup>   |
| SLC6A2      | norepinephrine transporter                     | 16q12.2      | Reported pharmacogenetic association <sup>9</sup>    |
| SLC6A3      | dopamine transporter                           | 5p15.3       | Dopamine signaling                                   |
| HTR1A       | serotonin receptor 1A                          | 5q11.2-q13   | Reported pharmacogenetic association <sup>2</sup>    |
| HTR1B       | serotonin receptor 1B                          | 6q13         | Serotonin signaling                                  |
| HTR2A       | serotonin receptor 2A                          | 13q14-q21    | Reported pharmacogenetic association <sup>10</sup>   |
| HTR2B       | serotonin receptor 2B                          | 2q36.3-q37.1 | Serotonin signaling                                  |
| HTR2C       | serotonin receptor 2C                          | Xq24         | Serotonin signaling                                  |
| HTR3A       | serotonin receptor 3A                          | 11q23.1      | Serotonin signaling                                  |
| HTR3B       | serotonin receptor 3B                          | 11q23.1      | Serotonin signaling                                  |
| HTR4        | serotonin receptor 4                           | 5q31-q33     | Serotonin signaling                                  |
| HTR5A       | serotonin receptor5A                           | 7q36.1       | Serotonin signaling                                  |
| HTR7        | serotonin receptor 7                           | 10q21-q24    | Serotonin signaling                                  |
| ADRA1A      | adrenergic alpha-1A receptor                   | 8p21-p11.2   | Norepinephrine signaling                             |
| ADRA1B      | adrenergic alpha-1B receptor                   | 5q23-q32     | Norepinephrine signaling                             |
| ADRA2A      | adrenergic alpha-2A receptor                   | 10q24-q26    | Norepinephrine signaling                             |
| ADRA2B      | adrenergic alpha-2B receptor                   | 2p13-q13     | Norepinephrine signaling                             |
| ADRA2C      | adrenergic alpha-2C receptor                   | 4p16         | Norepinephrine signaling                             |
| DRD1        | dopamine receptor D1                           | 5q35.1       | Dopamine signaling                                   |
| DRD2        | dopamine receptor D2                           | 11q23        | Dopamine signaling                                   |
| DRD3        | dopamine receptor D3                           | 3q13.3       | Dopamine signaling                                   |

|         |                                                                    |               |                                                             |
|---------|--------------------------------------------------------------------|---------------|-------------------------------------------------------------|
| DRD4    | dopamine receptor D4                                               | 11p15.5       | Dopamine signaling                                          |
| DRD5    | dopamine receptor D5                                               | 4p16.1        | Dopamine signaling                                          |
| GRIK1   | glutamate receptor, ionotropic, kainate 1                          | 21q22.11      | Glutamate signaling                                         |
| GRIK2   | glutamate receptor, ionotropic, kainate 2                          | 6q16.3-q21    | Reported pharmacogenetic association <sup>11</sup>          |
| GRIK3   | glutamate receptor, ionotropic, kainate 3                          | 1p34-p33      | Glutamate signaling                                         |
| GRIK4   | glutamate receptor, ionotropic, kainate 4                          | 11q22.3       | Reported pharmacogenetic association <sup>12</sup>          |
| GRIK5   | glutamate receptor, ionotropic, kainate 5                          | 19q13.2       | Glutamate signaling                                         |
| GRIA1   | glutamate receptor, ionotropic, AMPA 1                             | 5q31.1        | Glutamate signaling                                         |
| GRIA2   | glutamate receptor, ionotropic, AMPA 2                             | 4q32-q33      | Glutamate signaling                                         |
| GRIA3   | glutamate receptor, ionotropic, AMPA 3                             | Xq25-q26      | Reported pharmacogenetic association <sup>11</sup>          |
| GRIA4   | glutamate receptor, ionotropic, AMPA 4                             | 11q22         | Glutamate signaling                                         |
| GRIN1   | glutamate receptor, ionotropic, N-methyl D-aspartate 1             | 9q34.3        | Glutamate signaling                                         |
| GRIN2A  | glutamate receptor, ionotropic, N-methyl D-aspartate 2A            | 16p13.2       | Glutamate signaling                                         |
| GRIN2B  | glutamate receptor, ionotropic, N-methyl D-aspartate 2B            | 12p12         | Glutamate signaling                                         |
| GRIN2C  | glutamate receptor, ionotropic, N-methyl D-aspartate 2C            | 17q.25        | Glutamate signaling                                         |
| GRIN2D  | glutamate receptor, ionotropic, N-methyl D-aspartate 2D            | 19q13.1-qter  | Glutamate signaling                                         |
| GRIN3A  | glutamate receptor, ionotropic, N-methyl D-aspartate 3A            | 9q31.1        | Glutamate signaling                                         |
| GNB3    | guanine nucleotide binding protein (G protein), beta polypeptide 3 | 12p.13        | Reported pharmacogenetic association <sup>13</sup>          |
| FKBP5   | FK506 binding protein 5                                            | 6p21.3-p21.2  | Reported pharmacogenetic association <sup>14,15</sup>       |
| TPH1    | tryptophan hydroxylase 1                                           | 11p15.3-p14   | Reported pharmacogenetic associations <sup>2</sup>          |
| TPH2    | tryptophan hydroxylase 2                                           | 12q21.1       | Serotonin synthesis                                         |
| MAOA    | monoamine oxidase A                                                | Xp11.3        | Monoamine signaling                                         |
| COMT    | catechol-O-methyltransferase                                       | 22q11.21      | Monoamine signaling                                         |
| AVPR1A  | arginine vasopressin receptor 1A                                   | 12q14-q15     | Related to AVPR1B                                           |
| AVPR1B  | arginine vasopressin receptor 1B                                   | 1q32          | Involved in antidepressant effect <sup>16</sup>             |
| ABCB1   | ATP-binding cassette, sub-family B (MDR/TAP), member 1             | 7q21.1        | Reported pharmacogenetic association <sup>17</sup>          |
| P2RX7   | purinergic receptor P2X, ligand-gated ion channel, 7               | 12q24         | Associated with depression <sup>18,19</sup>                 |
| PCLO    | piccolo (presynaptic cytomatrix protein)                           | 7q11.23-q21.3 | Associated with depression <sup>20</sup>                    |
| ANK3    | ankyrin 3, node of Ranvier (ankyrin G)                             | 10q21         | Associated with bipolar affective disorder <sup>21,22</sup> |
| CACNA1C | calcium channel, voltage-dependent, L type, alpha 1C subunit       | 12p13.3       | Associated with bipolar affective disorder <sup>21,23</sup> |
| ZNF804A | zinc finger protein 804A                                           | 2q32.1        | Associated with schizophrenia <sup>24</sup>                 |
| LEP     | leptin                                                             | 7q31.3        | Antidepressant effect of leptin <sup>25,26</sup>            |
| LEPR    | leptin receptor                                                    | 1p31          | Antidepressant effect of leptin <sup>25,26</sup>            |
| PDE1A   | phosphodiesterase 1A, calmodulin-dependent                         | 2q32.1        | Reported pharmacogenetic association <sup>27</sup>          |

|        |                                                            |                 |                                                    |
|--------|------------------------------------------------------------|-----------------|----------------------------------------------------|
| PDE9A  | phosphodiesterase 9A                                       | 21q22.3         | Reported pharmacogenetic association <sup>27</sup> |
| PDE11A | phosphodiesterase 11A                                      | 2q31.2          | Reported pharmacogenetic association <sup>27</sup> |
| PSMB4  | proteasome (prosome, macropain) subunit, beta type, 4      | 1q21            | Reported pharmacogenetic association <sup>28</sup> |
| TBX21  | T-box 21                                                   | 17q21.32        | Reported pharmacogenetic association <sup>28</sup> |
| CD3E   | CD3e molecule, epsilon (CD3-TCR complex)                   | 11q23           | Reported pharmacogenetic association <sup>28</sup> |
| PRKCH  | protein kinase C, eta                                      | 14q22-q23       | Reported pharmacogenetic association <sup>28</sup> |
| IL6    | interleukin 6 (interferon, beta 2)                         | 7p21            | Involved in depression <sup>29</sup>               |
| PSMD9  | proteasome (prosome, macropain) 26S subunit, non-ATPase, 9 | 12q24.31-q24.32 | Reported pharmacogenetic association <sup>28</sup> |
| STAT3  | signal transducer and activator of transcription 3         | 17q21.31        | Reported pharmacogenetic association <sup>28</sup> |

---

**Supplementary Table S2: Strongest associated markers in each candidate gene in the whole sample analysis.**

| Chromosome | Gene    | Markers per gene | Strongest associated marker | MAF  | Alleles | Whole sample |          | Escitalopram |          | Nortriptyline |          | Gene x drug |          | HWE p-value |
|------------|---------|------------------|-----------------------------|------|---------|--------------|----------|--------------|----------|---------------|----------|-------------|----------|-------------|
|            |         |                  |                             |      |         | <i>b</i>     | <i>p</i> | <i>b</i>     | <i>p</i> | <i>b</i>      | <i>p</i> | <i>b</i>    | <i>p</i> |             |
| 1          | GRIK3   | 31               | rs11801494                  | 0.10 | T/C     | 8.7          | 0.00132  | 8.4          | 0.02852  | 9.3           | 0.01593  | 1.4         | 0.79690  | 0.38870     |
| 1          | LEPR    | 44               | rs913199                    | 0.45 | T/G     | 4.5          | 0.00346  | 2.5          | 0.23710  | 7.1           | 0.00215  | 4.4         | 0.15940  | 0.49460     |
| 1          | PSMB4   | 5                | rs1887545                   | 0.20 | A/G     | 0.9          | 0.64780  | 1.0          | 0.72780  | 0.5           | 0.87680  | -0.6        | 0.88100  | 0.05613     |
| 1          | AVPR1B  | 11               | rs28419084                  | 0.08 | T/C     | 4.3          | 0.14600  | 8.7          | 0.02513  | -2.2          | 0.62170  | -11.6       | 0.05068  | 0.61080     |
| 2          | ADRA2B  | 5                | rs749457                    | 0.34 | G/A     | -1.4         | 0.40960  | -2.1         | 0.37110  | -0.2          | 0.93210  | 2.2         | 0.50190  | 0.67730     |
| 2          | PDE11A  | 108              | rs7594290                   | 0.06 | T/C     | 6.6          | 0.04947  | 5.9          | 0.18340  | 7.1           | 0.16630  | 0.8         | 0.90010  | 0.49410     |
| 2          | PDE1A   | 79               | rs17649232                  | 0.08 | C/T     | -5.8         | 0.04603  | -4.7         | 0.26520  | -6.5          | 0.11390  | -1.5        | 0.80390  | 0.21730     |
| 2          | ZNF804A | 31               | rs1021043                   | 0.38 | G/A     | -3.7         | 0.02331  | -5.0         | 0.02221  | -1.9          | 0.43510  | 2.9         | 0.37850  | 0.63250     |
| 2          | CREB1   | 7                | rs2551949                   | 0.21 | G/A     | 1.5          | 0.44010  | 0.4          | 0.87940  | 2.8           | 0.35750  | 2.4         | 0.54390  | 0.82340     |
| 2          | HTR2B   | 4                | rs13394402                  | 0.16 | T/G     | 3.8          | 0.06276  | 4.5          | 0.09844  | 3.3           | 0.28970  | -0.8        | 0.85230  | 0.01888     |
| 3          | SLC6A1  | 43               | rs9682960                   | 0.13 | C/T     | 5.0          | 0.03117  | 7.2          | 0.02488  | 3.2           | 0.34620  | -3.9        | 0.40830  | 0.73760     |
| 3          | DRD3    | 23               | rs7631540                   | 0.45 | T/C     | 2.8          | 0.08330  | 2.7          | 0.21530  | 3.2           | 0.19970  | 0.2         | 0.94520  | 0.32370     |
| 3          | GSK3B   | 24               | rs11919783                  | 0.10 | A/G     | -6.1         | 0.01846  | -10.1        | 0.00482  | -1.5          | 0.69360  | 8.4         | 0.10350  | 1.00000     |
| 4          | ADRA2C  | 5                | rs12506413                  | 0.19 | T/C     | -3.0         | 0.13760  | -1.3         | 0.62310  | -6.1          | 0.04878  | -4.7        | 0.25090  | 0.53810     |
| 4          | DRD5    | 4                | rs1878943                   | 0.17 | T/C     | -2.5         | 0.23870  | -1.8         | 0.53760  | -3.1          | 0.31480  | -1.5        | 0.72320  | 0.89330     |
| 4          | GRIA2   | 9                | rs4691394                   | 0.14 | A/G     | 2.7          | 0.23020  | 4.2          | 0.17190  | 1.3           | 0.69400  | -3.4        | 0.44670  | 0.20720     |
| 5          | SLC6A3  | 27               | rs11133767                  | 0.34 | T/C     | -3.9         | 0.02023  | -5.1         | 0.02583  | -3.0          | 0.23440  | 1.9         | 0.56880  | 0.93270     |
| 5          | HTR1A   | 2                | rs1364043                   | 0.22 | G/T     | -2.5         | 0.17980  | -6.4         | 0.01261  | 2.1           | 0.44280  | 8.6         | 0.02093  | 0.44770     |
| 5          | NR3C1   | 21               | rs2963156                   | 0.23 | T/C     | 3.3          | 0.08692  | 3.4          | 0.20950  | 3.3           | 0.22990  | 0.1         | 0.98330  | 0.45550     |
| 5          | HTR4    | 41               | rs1345697                   | 0.49 | C/T     | 2.5          | 0.11040  | 0.5          | 0.80710  | 5.1           | 0.03376  | 4.9         | 0.12190  | 0.65170     |
| 5          | GRIA1   | 99               | rs9324752                   | 0.31 | G/A     | 4.0          | 0.02963  | 4.5          | 0.07040  | 4.0           | 0.15390  | -0.8        | 0.82950  | 0.00016     |
| 5          | ADRA1B  | 22               | rs6892282                   | 0.44 | T/G     | 4.1          | 0.00999  | 3.8          | 0.06668  | 4.2           | 0.09307  | 0.1         | 0.97440  | 0.81940     |
| 5          | DRD1    | 23               | rs266004                    | 0.49 | T/G     | -2.4         | 0.11940  | -1.6         | 0.45510  | -3.3          | 0.14480  | -2.1        | 0.48690  | 0.32800     |
| 6          | FKBP5   | 23               | rs6931945                   | 0.35 | A/G     | -2.6         | 0.09076  | -4.0         | 0.05179  | -1.2          | 0.62760  | 3.2         | 0.30740  | 0.00115     |
| 6          | HTR1B   | 13               | rs1936158                   | 0.37 | T/G     | 2.6          | 0.10130  | 5.7          | 0.00962  | -1.0          | 0.69170  | -6.4        | 0.04840  | 0.68740     |
| 6          | GRIK2   | 166              | rs2782900                   | 0.31 | C/T     | 3.5          | 0.03780  | 4.3          | 0.05071  | 2.1           | 0.41230  | -2.1        | 0.54540  | 0.60140     |
| 7          | IL6     | 17               | rs7801617                   | 0.11 | A/G     | 4.6          | 0.07486  | 10.7         | 0.00213  | -2.4          | 0.52950  | -13.8       | 0.00689  | 0.44170     |
| 7          | PCLO    | 82               | rs16887353                  | 0.10 | G/A     | 4.4          | 0.09487  | 1.8          | 0.59490  | 7.5           | 0.07195  | 5.5         | 0.30380  | 0.68500     |
| 7          | ABCB1   | 65               | rs7793196                   | 0.16 | G/A     | -4.1         | 0.04629  | -4.0         | 0.15110  | -4.7          | 0.12890  | -1.0        | 0.80280  | 0.02717     |

|    |         |     |            |      |     |       |         |       |         |       |         |       |         |         |
|----|---------|-----|------------|------|-----|-------|---------|-------|---------|-------|---------|-------|---------|---------|
| 7  | LEP     | 12  | rs1466146  | 0.12 | A/G | -4.8  | 0.04779 | -4.6  | 0.16480 | -4.8  | 0.18130 | 0.0   | 0.99800 | 1.00000 |
| 7  | HTR5A   | 18  | rs2241859  | 0.30 | T/G | -2.3  | 0.19730 | -2.5  | 0.28760 | -1.8  | 0.49300 | 0.4   | 0.90600 | 0.17770 |
| 8  | ADRA1A  | 69  | rs13261597 | 0.06 | G/A | -10.8 | 0.00095 | -10.7 | 0.01200 | -11.0 | 0.03286 | -0.4  | 0.94710 | 1.00000 |
| 9  | NTRK2   | 82  | rs17087753 | 0.09 | C/T | -5.7  | 0.02693 | -9.4  | 0.00320 | 0.5   | 0.90730 | 9.8   | 0.07868 | 0.03973 |
| 9  | GRIN3A  | 62  | rs10081707 | 0.37 | A/G | 3.1   | 0.05674 | 4.4   | 0.04554 | 1.0   | 0.67890 | -3.4  | 0.30050 | 0.57090 |
| 9  | GRIN1   | 3   | rs10870198 | 0.35 | G/A | 4.0   | 0.01774 | 3.8   | 0.09270 | 4.8   | 0.06084 | 1.1   | 0.75100 | 0.28600 |
| 10 | ANK3    | 121 | rs12782806 | 0.14 | C/T | -4.9  | 0.02728 | -3.8  | 0.22060 | -5.7  | 0.08501 | -1.7  | 0.69950 | 0.43950 |
| 10 | HTR7    | 23  | rs7920627  | 0.03 | C/T | -13.0 | 0.00288 | -9.0  | 0.12910 | -17.7 | 0.00645 | -8.5  | 0.32990 | 0.54750 |
| 10 | ADRA2A  | 10  | rs7908645  | 0.29 | G/T | -3.7  | 0.03899 | -1.6  | 0.49720 | -6.0  | 0.02619 | -4.3  | 0.22710 | 0.19860 |
| 11 | DRD4    | 6   | rs11246226 | 0.50 | A/C | 1.7   | 0.28830 | -0.1  | 0.97950 | 3.4   | 0.14950 | 3.3   | 0.30240 | 0.32870 |
| 11 | TPH1    | 8   | rs17794760 | 0.18 | A/G | -3.4  | 0.09158 | -4.3  | 0.10340 | -2.1  | 0.50240 | 2.3   | 0.57990 | 0.43670 |
| 11 | BDNF    | 14  | rs2203877  | 0.48 | C/T | 2.4   | 0.11960 | 2.8   | 0.16850 | 1.7   | 0.49470 | -1.2  | 0.70600 | 0.36660 |
| 11 | GRIA4   | 57  | rs11226845 | 0.08 | C/T | -10.2 | 0.00077 | -9.8  | 0.02901 | -10.1 | 0.01658 | -0.6  | 0.91520 | 0.41740 |
| 11 | DRD2    | 29  | rs2734849  | 0.46 | A/G | -2.3  | 0.16680 | -3.4  | 0.12990 | -0.7  | 0.77300 | 2.7   | 0.40960 | 0.04880 |
| 11 | HTR3B   | 11  | rs1176744  | 0.32 | C/A | -3.9  | 0.02208 | -4.2  | 0.06997 | -3.7  | 0.15210 | 0.3   | 0.92700 | 0.43950 |
| 11 | HTR3A   | 24  | rs17543669 | 0.04 | C/T | -6.6  | 0.09174 | 2.5   | 0.67320 | -13.0 | 0.01280 | -15.1 | 0.05617 | 0.31700 |
| 11 | CD3E    | 6   | rs4938506  | 0.24 | A/G | -1.9  | 0.31450 | -1.9  | 0.44930 | -1.6  | 0.56350 | 0.1   | 0.98500 | 0.75980 |
| 11 | GRIK4   | 107 | rs3781817  | 0.47 | C/T | 3.9   | 0.01590 | 3.7   | 0.08905 | 4.2   | 0.08441 | 0.8   | 0.80130 | 0.32610 |
| 12 | CACNA1C | 193 | rs10848645 | 0.44 | G/A | 5.5   | 0.00033 | 4.1   | 0.05172 | 7.5   | 0.00104 | 3.0   | 0.32560 | 0.10910 |
| 12 | GNB3    | 16  | rs1129649  | 0.35 | C/T | 4.7   | 0.00400 | 2.9   | 0.19190 | 6.7   | 0.00601 | 3.5   | 0.28080 | 0.45650 |
| 12 | GRIN2B  | 176 | rs1805494  | 0.04 | T/C | -8.6  | 0.03030 | -14.2 | 0.01046 | -2.5  | 0.65930 | 11.1  | 0.16300 | 0.63050 |
| 12 | AVPR1A  | 13  | rs10219543 | 0.40 | T/A | -2.7  | 0.09047 | -1.6  | 0.47640 | -4.7  | 0.05527 | -3.3  | 0.31750 | 0.75390 |
| 12 | TPH2    | 34  | rs5019656  | 0.09 | T/C | 6.7   | 0.01219 | 5.9   | 0.11140 | 7.6   | 0.05265 | 1.9   | 0.72170 | 0.10330 |
| 12 | P2RX7   | 26  | rs12815078 | 0.10 | G/A | 5.6   | 0.03098 | 6.2   | 0.07919 | 4.6   | 0.23760 | -1.5  | 0.77870 | 0.27830 |
| 12 | PSMD9   | 6   | rs2230681  | 0.13 | T/C | 5.0   | 0.03008 | 4.0   | 0.18480 | 6.4   | 0.07940 | 2.8   | 0.55320 | 1.00000 |
| 13 | HTR2A   | 51  | rs1923884  | 0.14 | T/C | -4.0  | 0.07760 | -0.5  | 0.87600 | -9.4  | 0.00926 | -8.8  | 0.05546 | 0.76010 |
| 14 | PRKCH   | 80  | rs4902049  | 0.21 | G/A | 5.6   | 0.00348 | 4.3   | 0.09209 | 7.5   | 0.01171 | 3.1   | 0.42430 | 0.82340 |
| 14 | AKT1    | 4   | rs4983559  | 0.42 | G/A | -0.4  | 0.82140 | 1.9   | 0.37240 | -3.8  | 0.12190 | -5.8  | 0.06971 | 0.75820 |
| 16 | GRIN2A  | 147 | rs4782265  | 0.19 | A/G | -4.7  | 0.01736 | -4.2  | 0.11910 | -5.4  | 0.06471 | -0.8  | 0.84580 | 0.38770 |
| 16 | SLC6A2  | 40  | rs36023    | 0.38 | A/G | -5.5  | 0.00053 | -6.4  | 0.00240 | -4.7  | 0.05844 | 2.1   | 0.51780 | 0.42680 |
| 17 | SLC6A4  | 14  | rs2066713  | 0.38 | A/G | 1.9   | 0.23840 | 2.3   | 0.28020 | 1.1   | 0.64240 | -1.1  | 0.72800 | 0.34020 |
| 17 | STAT3   | 11  | rs8072785  | 0.09 | T/C | -6.1  | 0.02654 | -3.0  | 0.43630 | -8.9  | 0.02410 | -5.4  | 0.32640 | 0.81430 |
| 17 | CRHR1   | 19  | rs17763104 | 0.12 | A/G | -5.0  | 0.04258 | -8.1  | 0.01148 | -0.8  | 0.84120 | 7.7   | 0.12050 | 1.00000 |
| 17 | TBX21   | 5   | rs7502875  | 0.24 | C/A | 3.7   | 0.03777 | 7.3   | 0.00371 | 0.4   | 0.86260 | -6.9  | 0.05402 | 0.14960 |

|    |        |     |            |      |     |      |         |      |         |      |         |       |         |         |
|----|--------|-----|------------|------|-----|------|---------|------|---------|------|---------|-------|---------|---------|
| 17 | GRIN2C | 6   | rs690418   | 0.21 | T/C | 2.6  | 0.17240 | 4.4  | 0.08819 | 0.4  | 0.88130 | -4.1  | 0.29430 | 0.82150 |
| 19 | GRIK5  | 5   | rs4803523  | 0.20 | T/C | -2.9 | 0.14510 | -4.6 | 0.08134 | -0.8 | 0.80310 | 3.9   | 0.33490 | 0.48200 |
| 19 | GSK3A  | 1   | rs11878620 | 0.07 | A/G | 2.3  | 0.44290 | 8.0  | 0.05652 | -3.0 | 0.47000 | -11.5 | 0.05122 | 0.58230 |
| 19 | GRIN2D | 9   | rs276721   | 0.13 | C/T | -4.4 | 0.04534 | -7.6 | 0.00823 | -1.1 | 0.73860 | 6.3   | 0.15410 | 0.00524 |
| 21 | GRIK1  | 117 | rs363512   | 0.06 | A/G | 8.5  | 0.01032 | 0.7  | 0.87370 | 17.8 | 0.00023 | 16.5  | 0.01264 | 1.00000 |
| 21 | PDE9A  | 58  | rs13048733 | 0.09 | T/C | -8.2 | 0.00291 | -8.0 | 0.03081 | -8.6 | 0.03735 | -0.7  | 0.90460 | 0.34690 |
| 22 | COMT   | 31  | rs2239395  | 0.04 | G/T | 7.4  | 0.05834 | 9.0  | 0.08673 | 5.7  | 0.32580 | -3.8  | 0.63060 | 0.32870 |
| X  | MAOA   | 10  | rs3027409  | 0.03 | G/T | 6.3  | 0.19610 | 9.8  | 0.12080 | 0.3  | 0.96660 | .     | .       | 1.00000 |
| X  | HTR2C  | 16  | rs11167436 | 0.16 | A/C | 4.3  | 0.07653 | 4.4  | 0.19250 | 4.2  | 0.24200 | .     | .       | 0.29090 |
| X  | GRIA3  | 60  | rs5910001  | 0.21 | T/C | -4.4 | 0.03106 | -7.8 | 0.00673 | -0.5 | 0.86330 | .     | .       | 0.02154 |

**Supplementary Figure S1: Population structure.** Plots show individual loadings on principal components according to centre of recruitment.

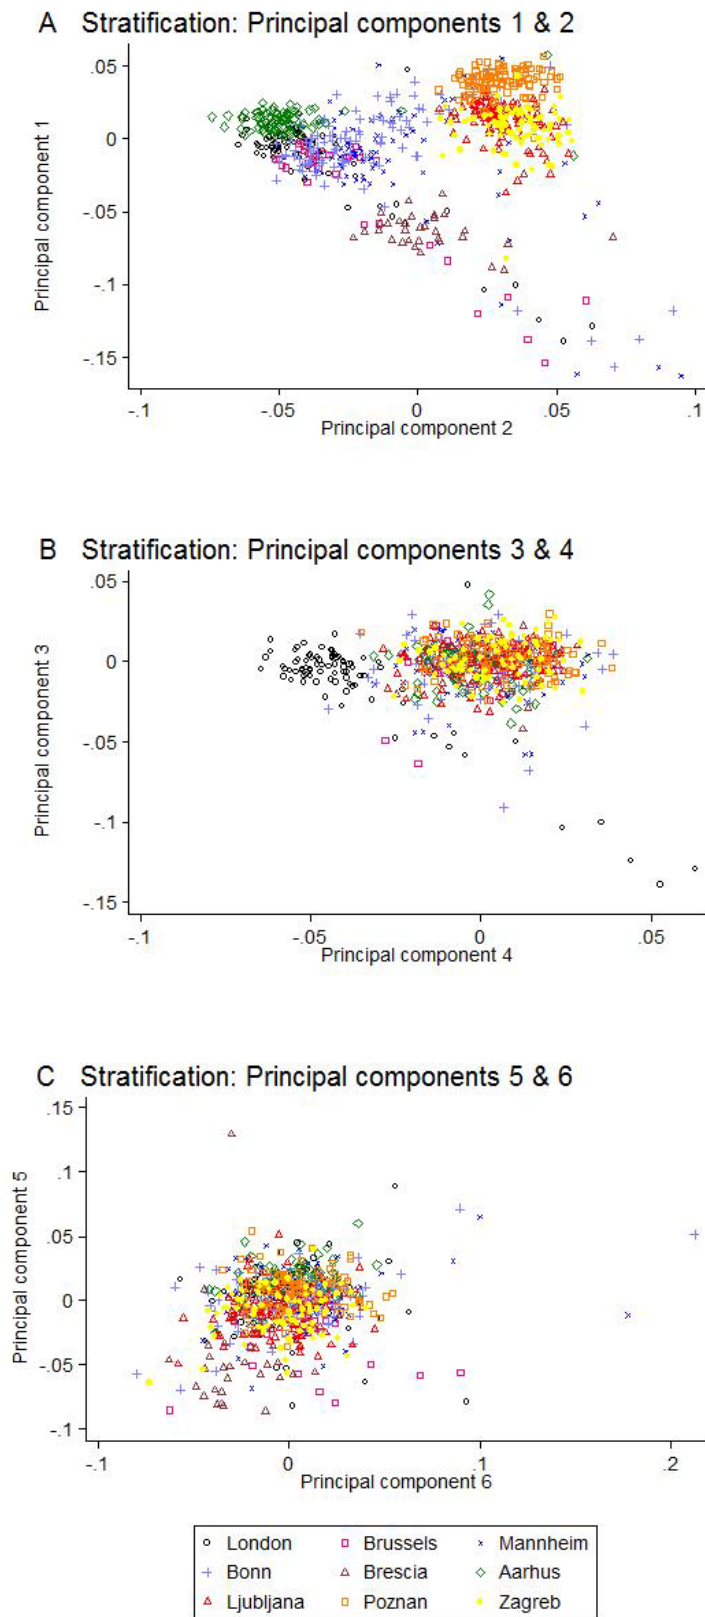

Supplementary Figure S2: Quantile-quantile plots for the genome-wide pharmacogenetic analyzes.

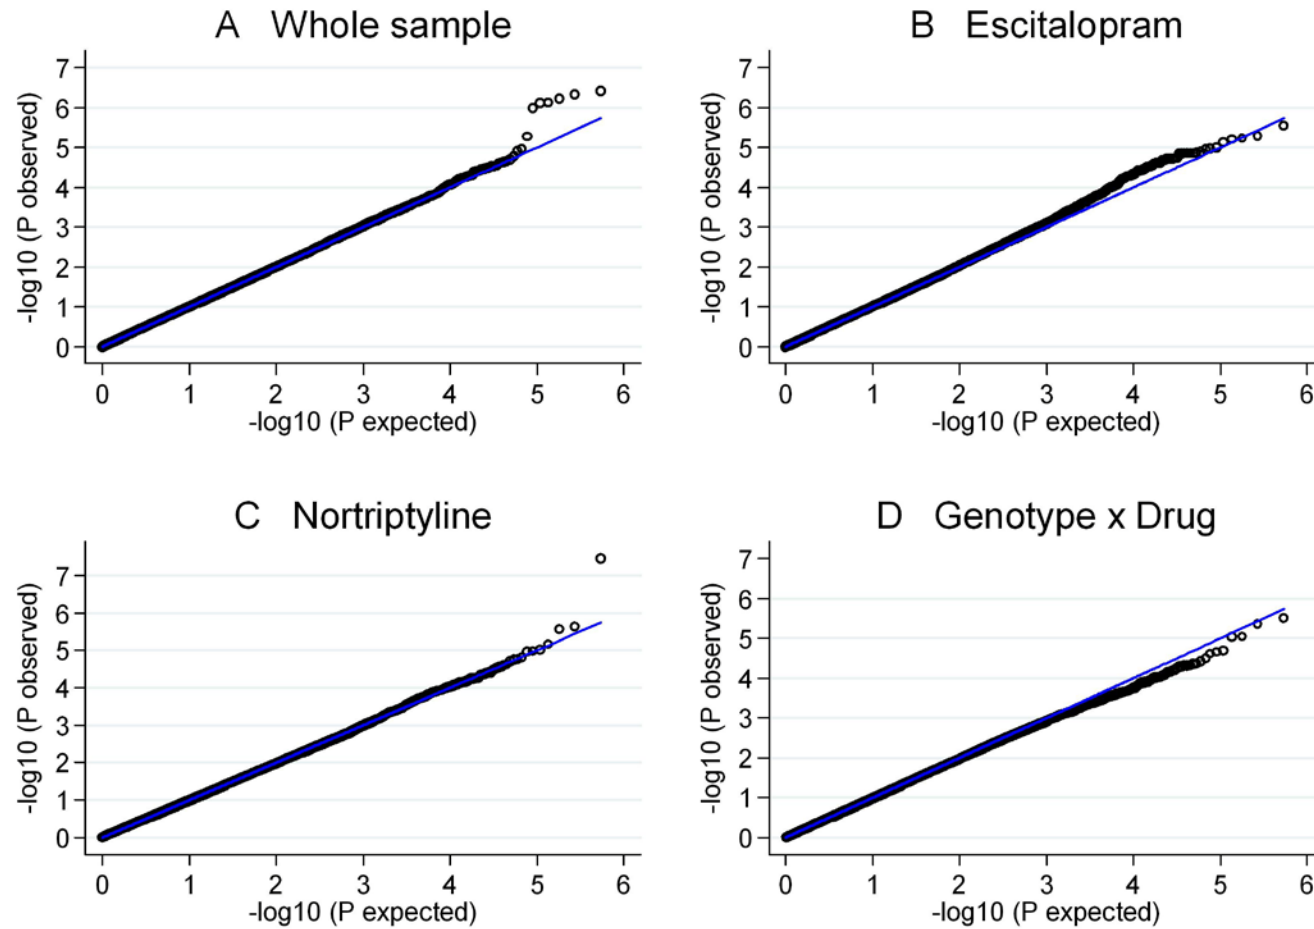



**Supplementary Figure S4: The associated markers within a copy number on chromosome 1 in genomic context.** Associated SNPs are marked in the top part of the Figure under the genomic position line. Under them are human expressed sequence tags (ESTs). Triangular LD plot is based on the Caucasian HapMap Phase II CEU sample. The Figure was produced using the UCSC genome browser (<http://genome.ucsc.edu/cgi-bin/hgTracks>).

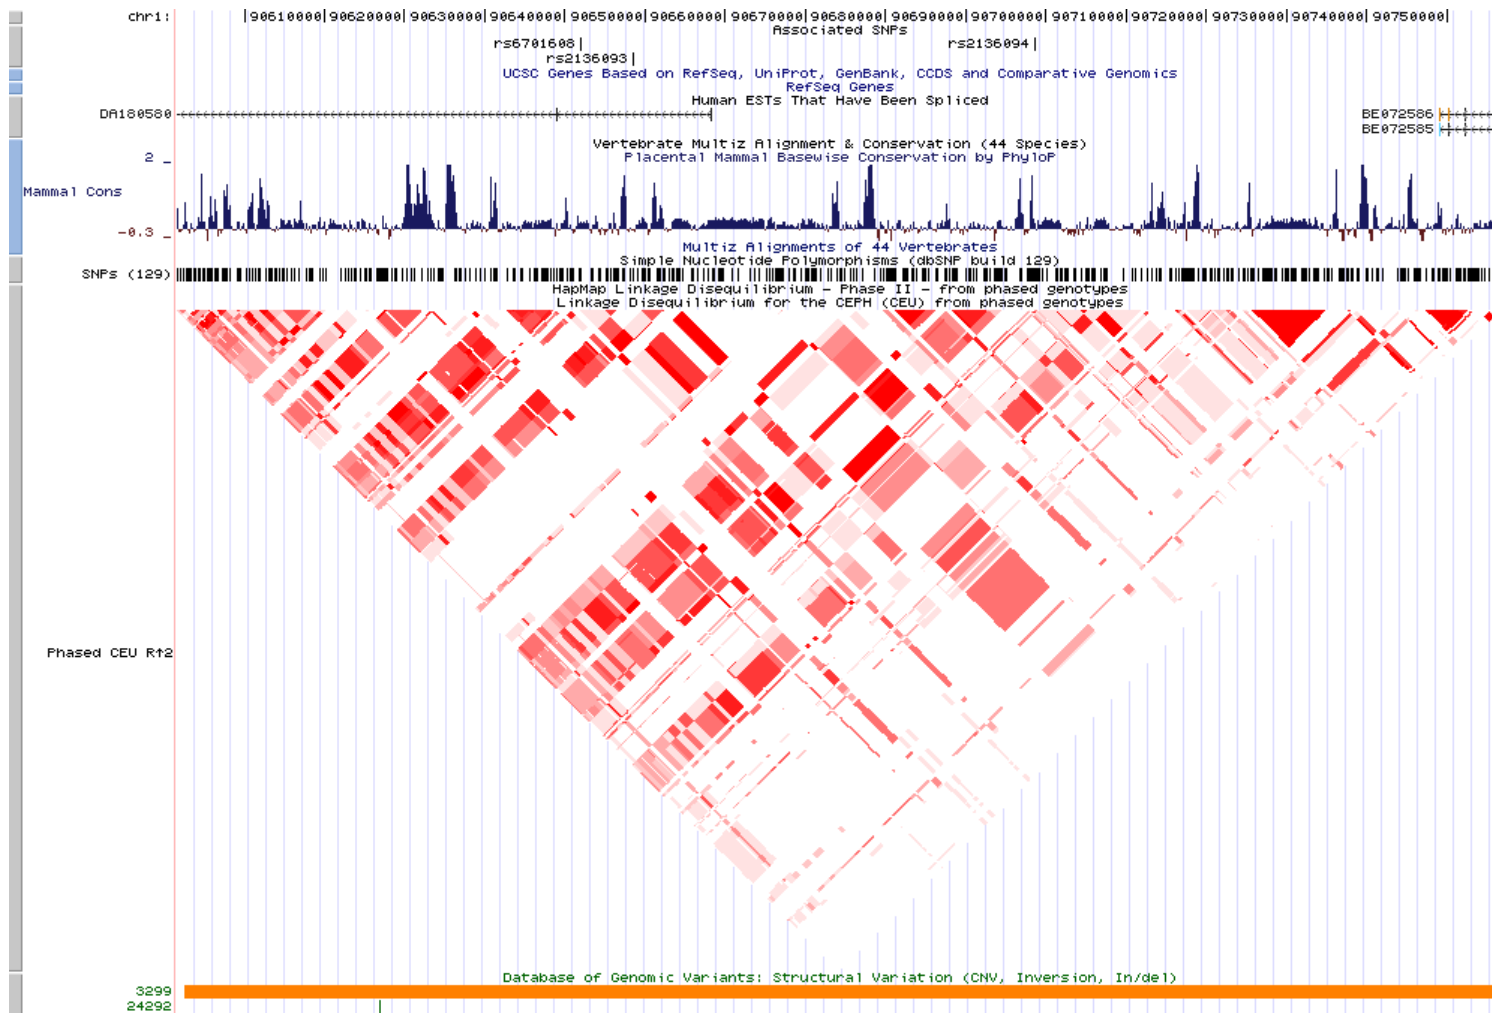

**Supplementary Figure S5: The associated markers within a copy number on chromosome 10 in genomic context.** Associated SNPs are marked in the top part of the Figure under the genomic position line. Under them are human expressed sequence tags (ESTs). Triangular LD plot is based on the Caucasian HapMap Phase II CEU sample. The Figure was produced using the UCSC genome browser (<http://genome.ucsc.edu/cgi-bin/hgTracks>).

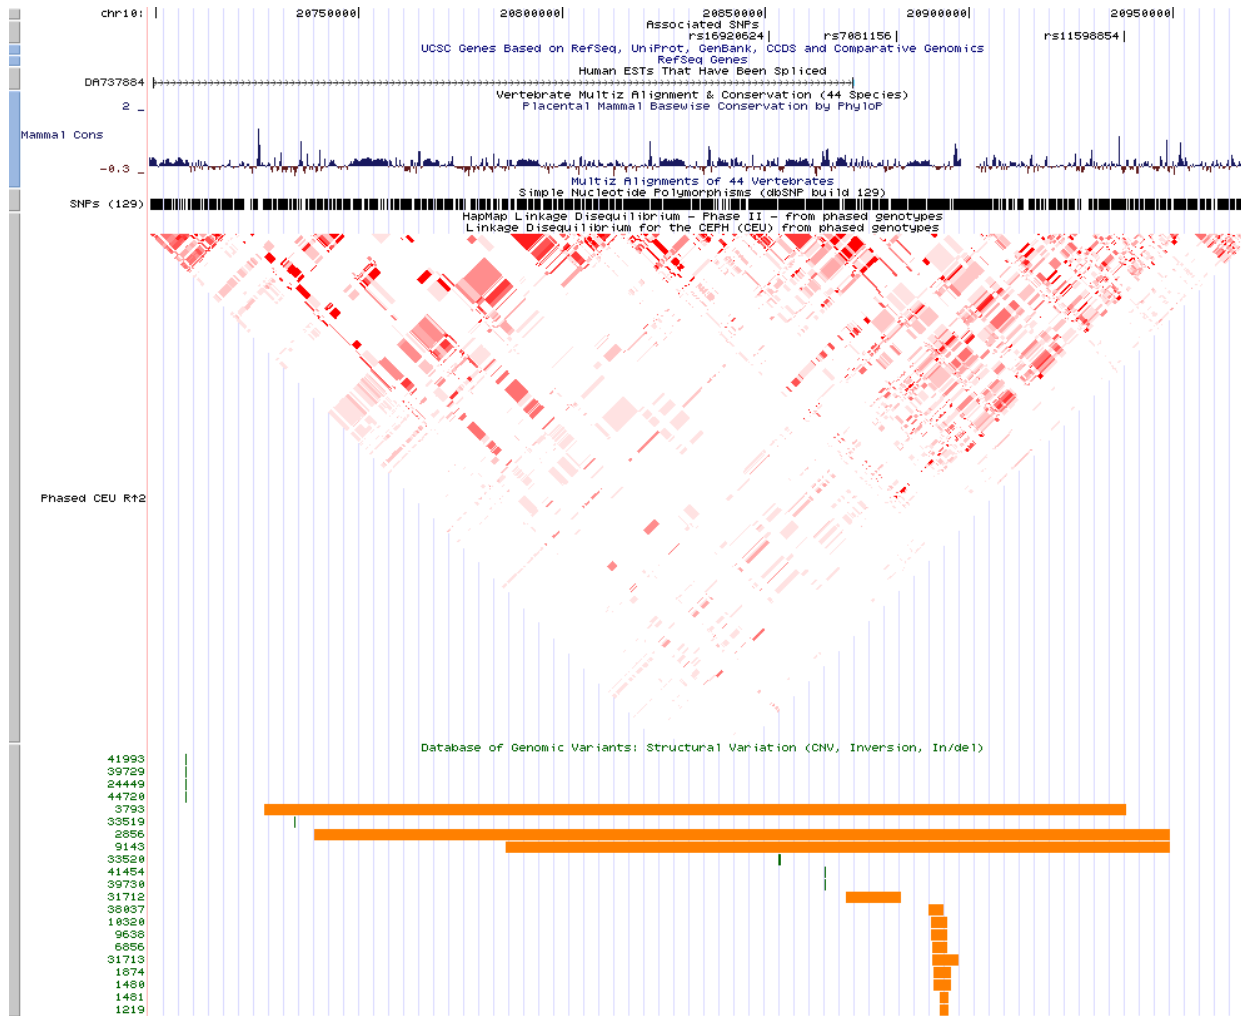

**Supplementary Figure S8: Marker rs2500535 in the *UST* gene and response to nortriptyline over the twelve weeks of treatment.** As there was only one AA homozygote, this individual was combined with the 36 heterozygotes.

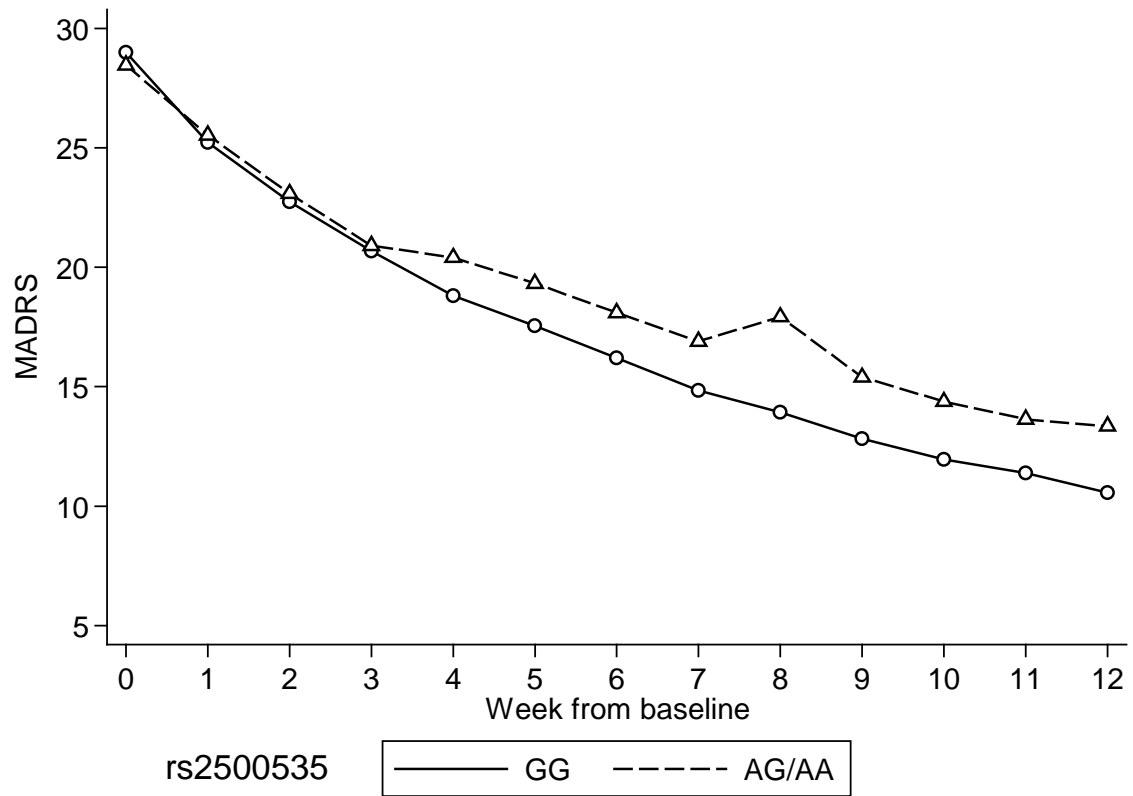

### Supplementary References:

- 1 Gratacos M, Soria V, Urretavizcaya M, Gonzalez JR, Crespo JM, Bayes M *et al.* A brain-derived neurotrophic factor (BDNF) haplotype is associated with antidepressant treatment outcome in mood disorders. *Pharmacogenomics J* 2008; **8**: 101-112.
- 2 Kato M, Serretti A. Review and meta-analysis of antidepressant pharmacogenetic findings in major depressive disorder. *Mol Psychiatry* 2008;
- 3 Adli M, Hollinde DL, Stamm T, Wiethoff K, Tsahuridu M, Kirchheiner J *et al.* Response to lithium augmentation in depression is associated with the glycogen synthase kinase 3-beta -50T/C single nucleotide polymorphism. *Biol Psychiatry* 2007; **62**: 1295-1302.
- 4 Tsai SJ, Liou YJ, Hong CJ, Yu YW, Chen TJ. Glycogen synthase kinase-3beta gene is associated with antidepressant treatment response in Chinese major depressive disorder. *Pharmacogenomics J* 2008; **8**: 384-390.
- 5 van Rossum EF, Binder EB, Majer M, Koper JW, Ising M, Modell S *et al.* Polymorphisms of the glucocorticoid receptor gene and major depression. *Biol Psychiatry* 2006; **59**: 681-688.
- 6 Bradley RG, Binder EB, Epstein MP, Tang Y, Nair HP, Liu W *et al.* Influence of child abuse on adult depression: moderation by the corticotropin-releasing hormone receptor gene. *Arch Gen Psychiatry* 2008; **65**: 190-200.
- 7 Perlis RH, Purcell S, Fava M, Fagerness J, Rush AJ, Trivedi MH, Smoller JW. Association between treatment-emergent suicidal ideation with citalopram and polymorphisms near cyclic adenosine monophosphate response element binding protein in the STAR\*D study. *Arch Gen Psychiatry* 2007; **64**: 689-697.
- 8 Serretti A, Kato M, De RD, Kinoshita T. Meta-analysis of serotonin transporter gene promoter polymorphism (5-HTTLPR) association with selective serotonin reuptake inhibitor efficacy in depressed patients. *Mol Psychiatry* 2007; **12**: 247-257.
- 9 Kim H, Lim SW, Kim S, Kim JW, Chang YH, Carroll BJ, Kim DK. Monoamine transporter gene polymorphisms and antidepressant response in Koreans with late-life depression. *JAMA* 2006; **296**: 1609-1618.
- 10 McMahon FJ, Buervenich S, Charney D, Lipsky R, Rush AJ, Wilson AF *et al.* Variation in the gene encoding the serotonin 2A receptor is associated with outcome of antidepressant treatment. *Am J Hum Genet* 2006; **78**: 804-814.
- 11 Laje G, Paddock S, Manji H, Rush AJ, Wilson AF, Charney D, McMahon FJ. Genetic markers of suicidal ideation emerging during citalopram treatment of major depression. *Am J Psychiatry* 2007; **164**: 1530-1538.
- 12 Paddock S, Laje G, Charney D, Rush AJ, Wilson AF, Sorant AJ *et al.* Association of GRIK4 with outcome of antidepressant treatment in the STAR\*D cohort. *Am J Psychiatry* 2007; **164**: 1181-1188.

- 13 Kang RH, Hahn SW, Choi MJ, Lee MS. Relationship between G-protein beta-3 subunit C825T polymorphism and mirtazapine responses in Korean patients with major depression. *Neuropsychobiology* 2007; **56**: 1-5.
- 14 Binder EB, Bradley RG, Liu W, Epstein MP, Deveau TC, Mercer KB *et al.* Association of FKBP5 polymorphisms and childhood abuse with risk of posttraumatic stress disorder symptoms in adults. *JAMA* 2008; **299**: 1291-1305.
- 15 Lekman M, Laje G, Charney D, Rush AJ, Wilson AF, Sorant AJ *et al.* The FKBP5-Gene in Depression and Treatment Response-an Association Study in the Sequenced Treatment Alternatives to Relieve Depression (STAR\*D) Cohort. *Biol Psychiatry* 2008;
- 16 Stewart LQ, Roper JA, Scott YW, III, O'Carroll AM, Lolait SJ. The role of the arginine vasopressin Avp1b receptor in the acute neuroendocrine action of antidepressants. *Psychoneuroendocrinology* 2008; **33**: 405-415.
- 17 Uhr M, Tontsch A, Namendorf C, Ripke S, Lucae S, Ising M *et al.* Polymorphisms in the drug transporter gene ABCB1 predict antidepressant treatment response in depression. *Neuron* 2008; **57**: 203-209.
- 18 Lucae S, Salyakina D, Barden N, Harvey M, Gagne B, Labbe M *et al.* P2RX7, a gene coding for a purinergic ligand-gated ion channel, is associated with major depressive disorder. *Hum Mol Genet* 2006; **15**: 2438-2445.
- 19 McQuillin A, Bass NJ, Choudhury K, Puri V, Kosmin M, Lawrence J *et al.* Case-control studies show that a non-conservative amino-acid change from a glutamine to arginine in the P2RX7 purinergic receptor protein is associated with both bipolar- and unipolar-affective disorders. *Mol Psychiatry* 2008;
- 20 Sullivan PF, de Geus EJ, Willemsen G, James MR, Smit JH, Zandbelt T *et al.* Genome-wide association for major depressive disorder: a possible role for the presynaptic protein piccolo. *Mol Psychiatry* 2008;
- 21 Ferreira MA, O'Donovan MC, Meng YA, Jones IR, Ruderfer DM, Jones L *et al.* Collaborative genome-wide association analysis supports a role for ANK3 and CACNA1C in bipolar disorder. *Nat Genet* 2008; **40**: 1056-1058.
- 22 Schulze TG, tera-Wadleigh SD, Akula N, Gupta A, Kassem L, Steele J *et al.* Two variants in Ankyrin 3 (ANK3) are independent genetic risk factors for bipolar disorder. *Mol Psychiatry* 2008;
- 23 Sklar P, Smoller JW, Fan J, Ferreira MA, Perlis RH, Chambert K *et al.* Whole-genome association study of bipolar disorder. *Mol Psychiatry* 2008; **13**: 558-569.
- 24 O'Donovan MC, Craddock N, Norton N, Williams H, Peirce T, Moskvina V *et al.* Identification of loci associated with schizophrenia by genome-wide association and follow-up. *Nat Genet* 2008; **40**: 1053-1055.
- 25 Lu XY, Kim CS, Frazer A, Zhang W. Leptin: a potential novel antidepressant. *Proc Natl Acad Sci U S A* 2006; **103**: 1593-1598.
- 26 Lu XY. The leptin hypothesis of depression: a potential link between mood disorders and obesity? *Curr Opin Pharmacol* 2007; **7**: 648-652.

- 27 Wong ML, Whelan F, Deloukas P, Whittaker P, Delgado M, Cantor RM *et al.* Phosphodiesterase genes are associated with susceptibility to major depression and antidepressant treatment response. *Proc Natl Acad Sci U S A* 2006; **103**: 15124-15129.
- 28 Wong ML, Dong C, Maestre-Mesa J, Licinio J. Polymorphisms in inflammation-related genes are associated with susceptibility to major depression and antidepressant response. *Mol Psychiatry* 2008;
- 29 Bull SJ, Huezio-Diaz P, Binder EB, Cubells JF, Ranjith G, Maddock C *et al.* Functional polymorphisms in the interleukin-6 and serotonin transporter genes, and depression and fatigue induced by interferon-alpha and ribavirin treatment. *Mol Psychiatry* 2008;
